# Supplementary material
Source: bioRxiv or medRxiv preprint supplement (http://www.biorxiv.org/highwire/filestream/14864/field_highwire_adjunct_files/1/036822-2.pdf)

# Supplementary Figure 1

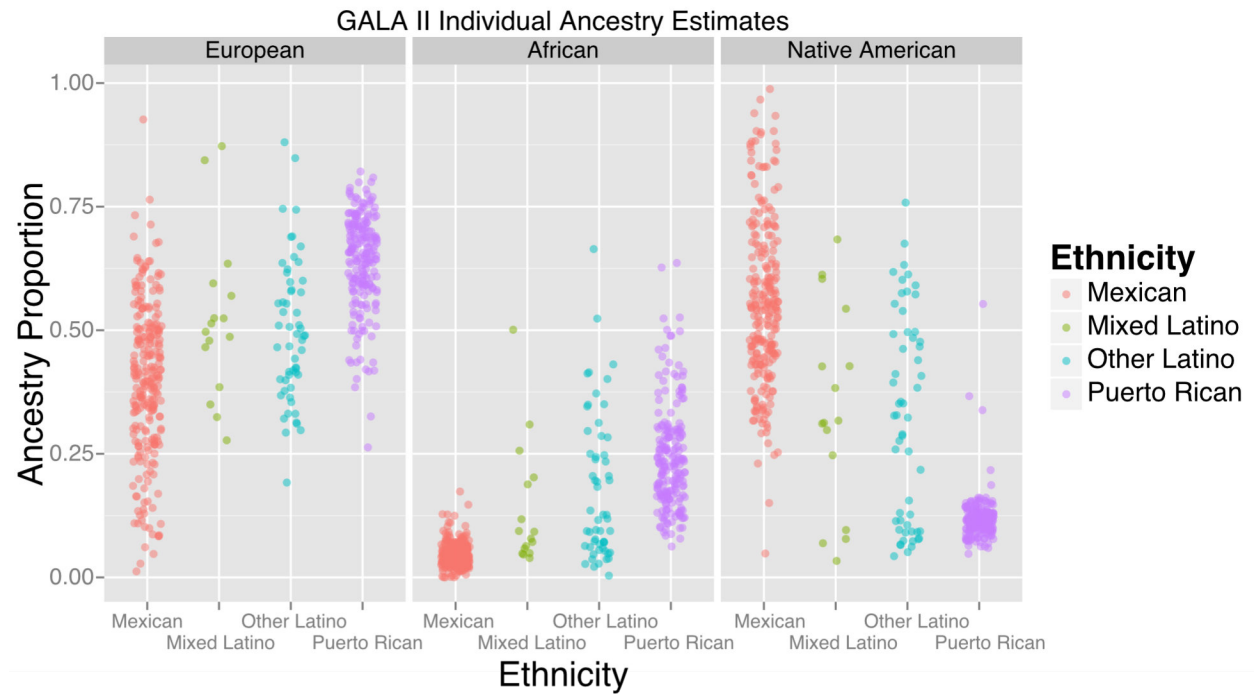

# Supplementary Figure 2

## A

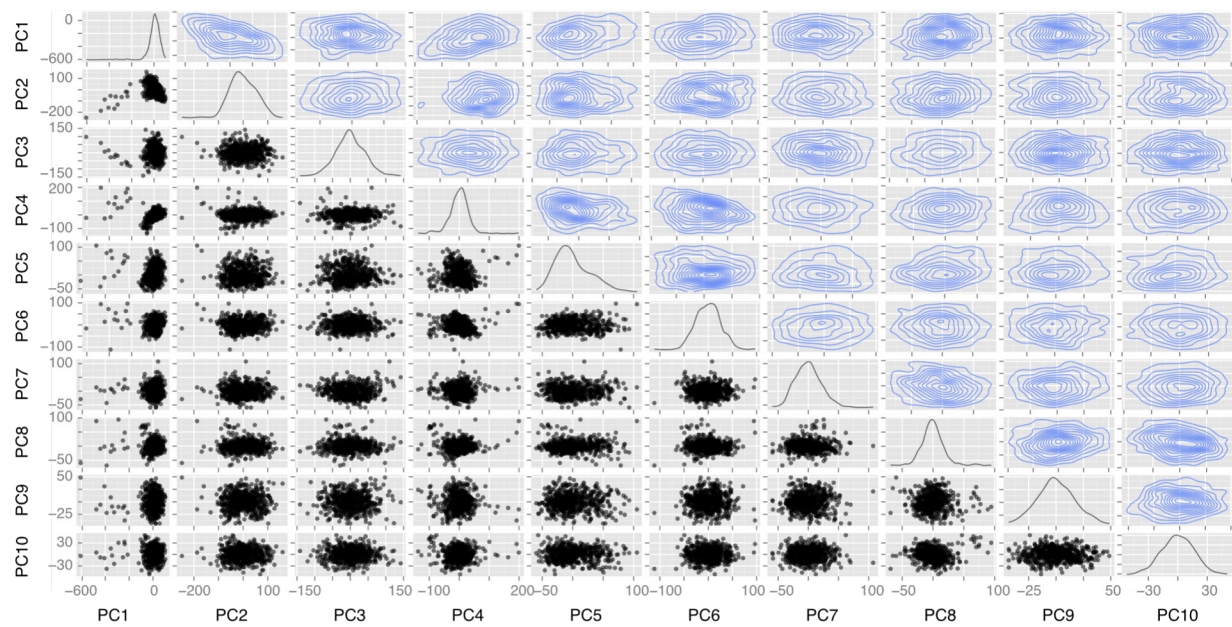

## B

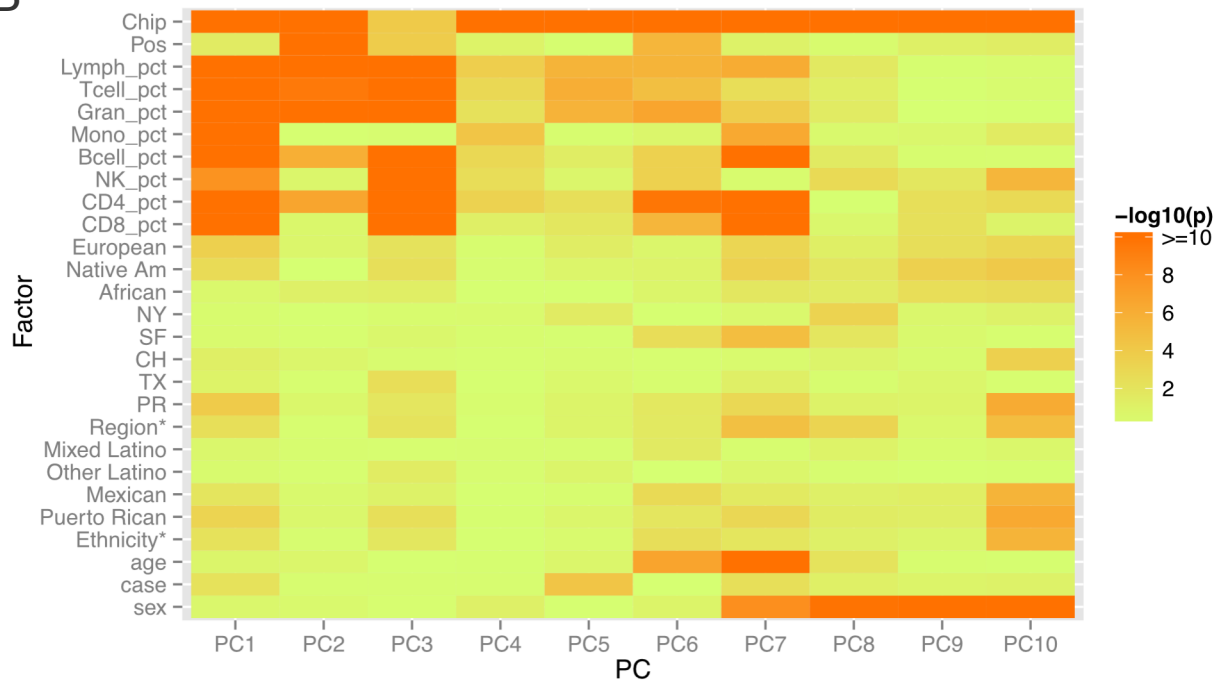

# Supplementary Figure 3

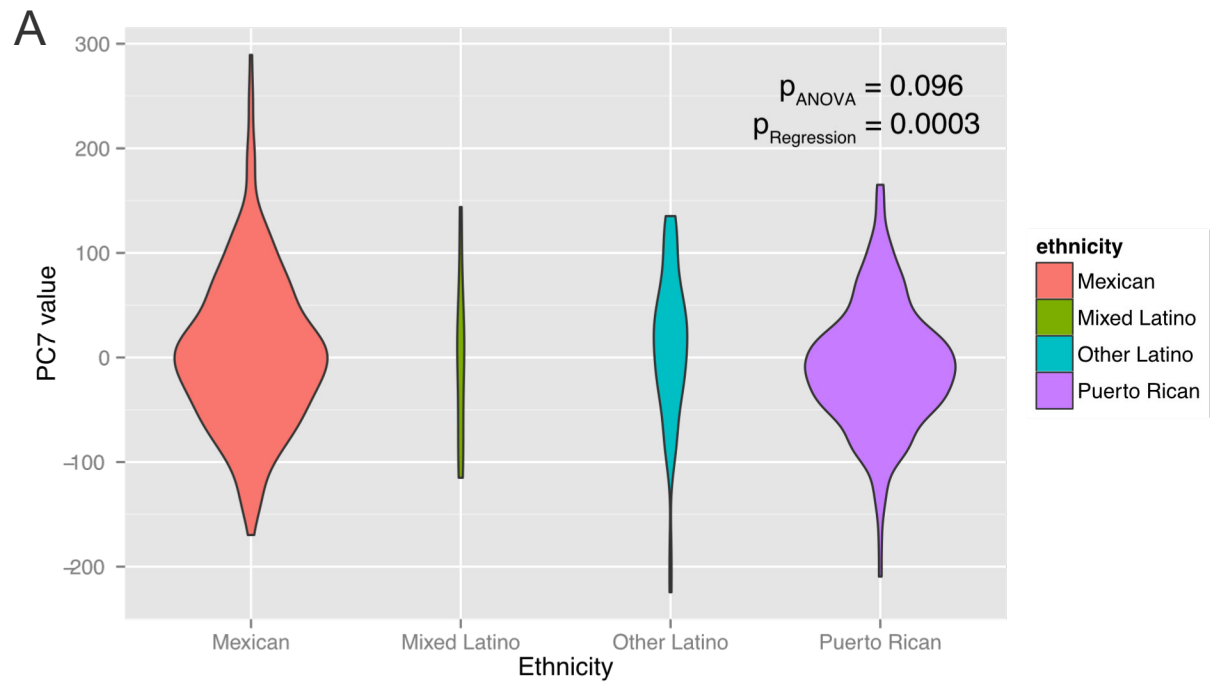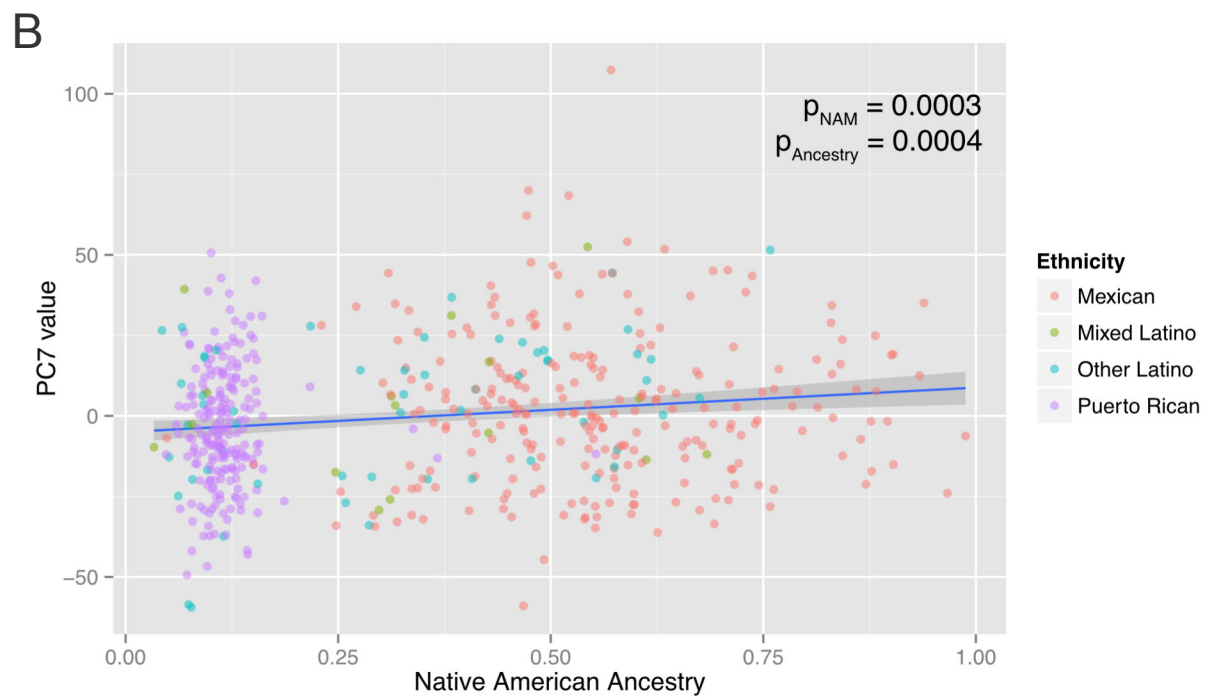

# Supplementary Figure 4 A

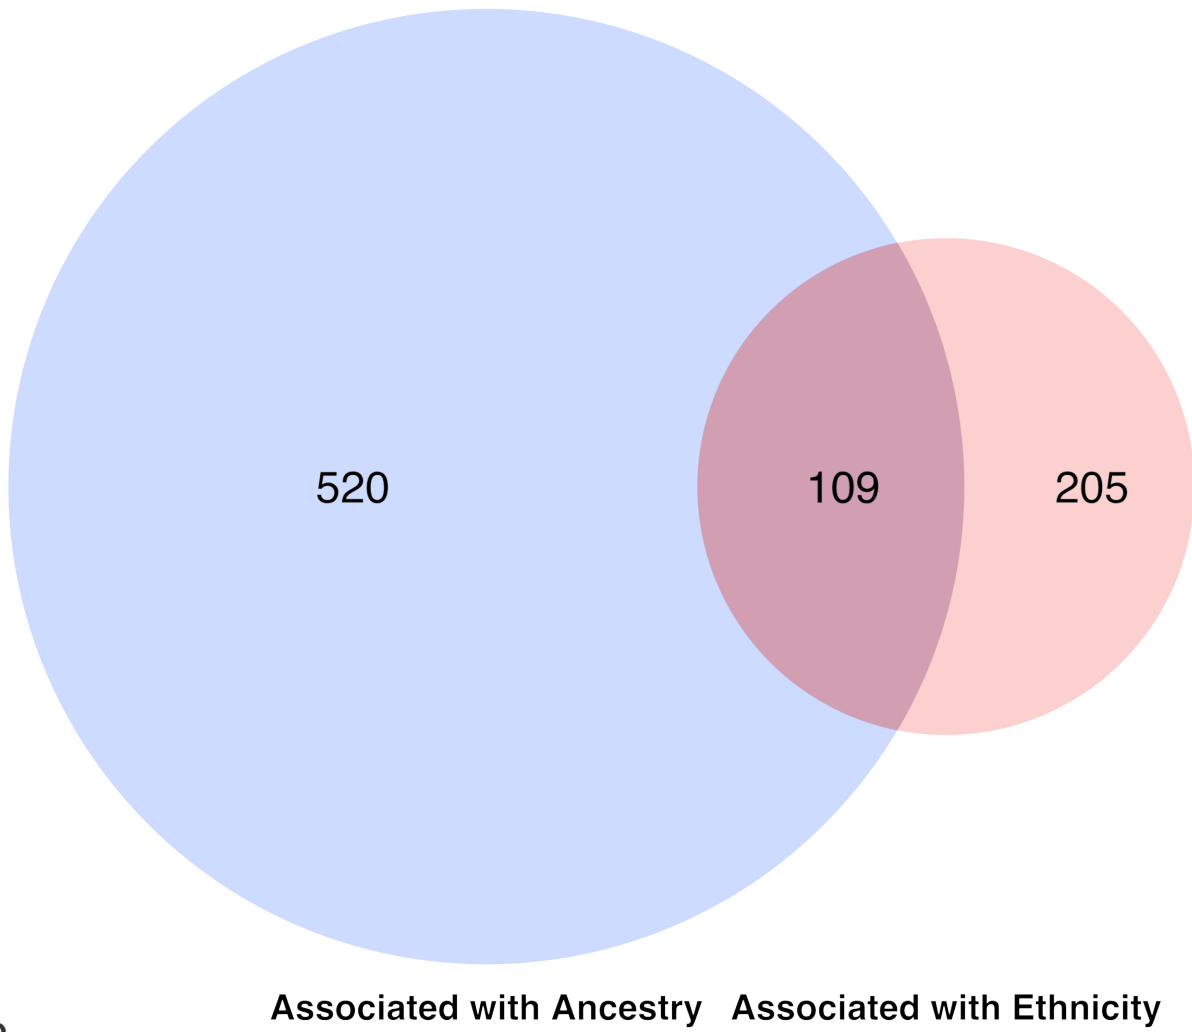

## B

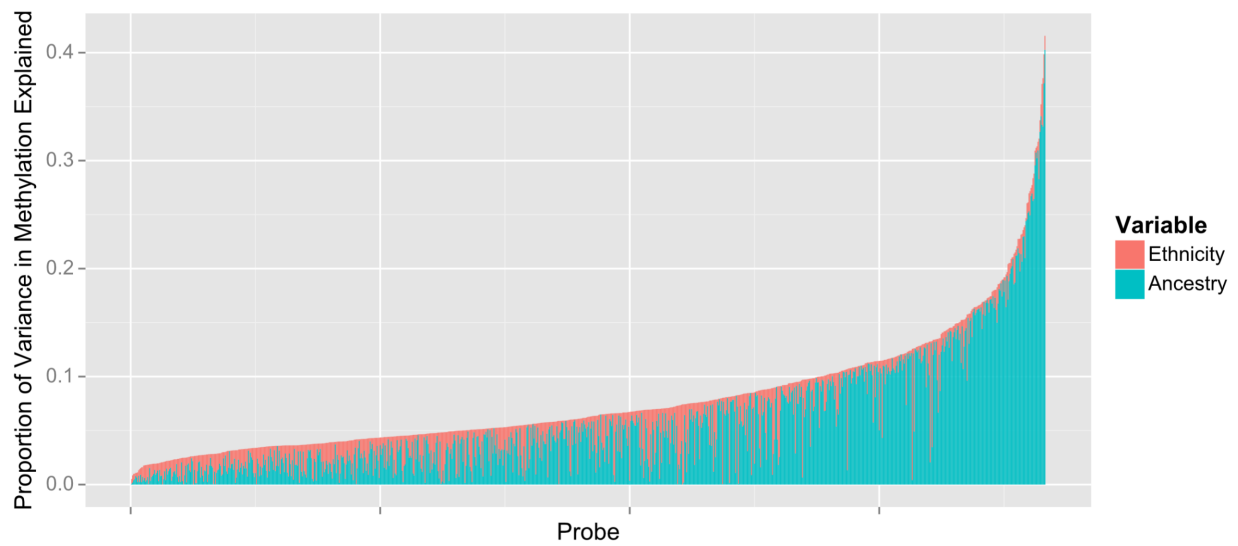

# Supplementary Figure 5

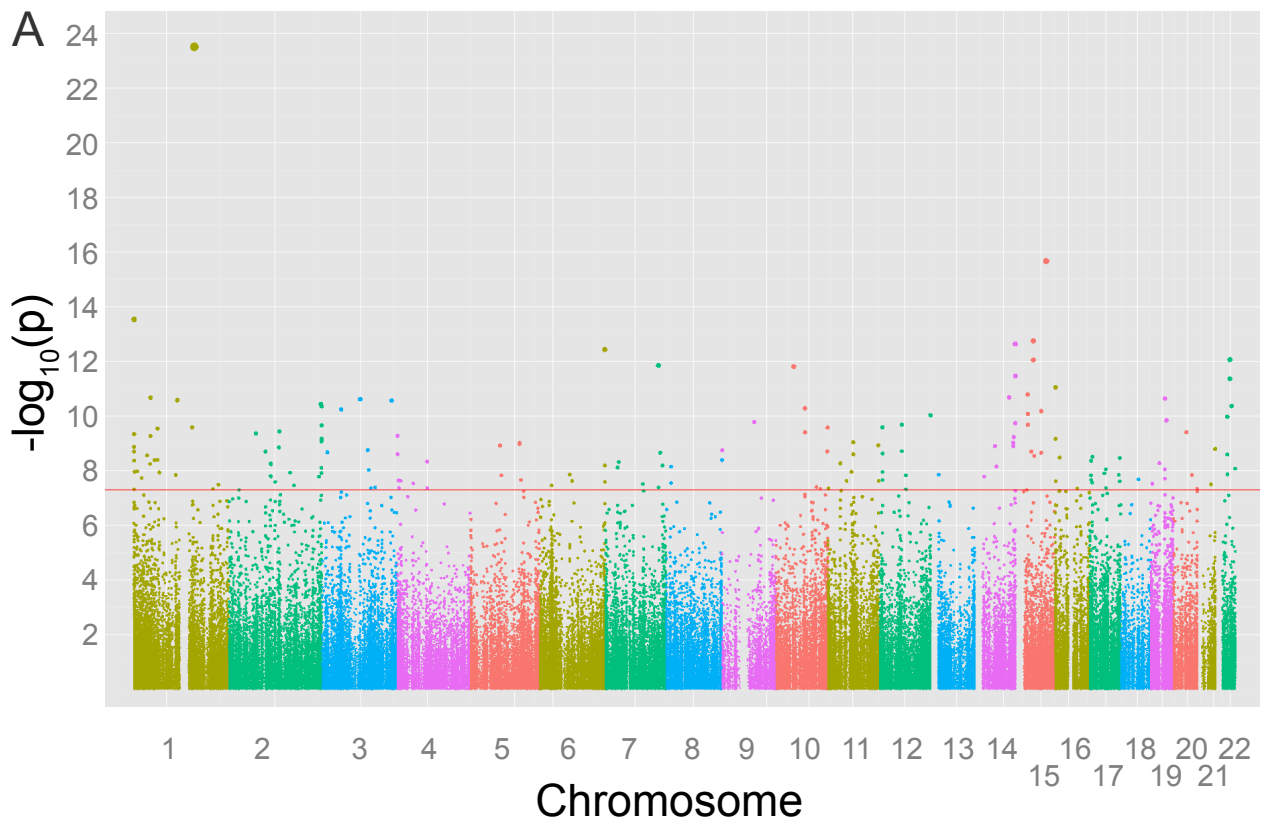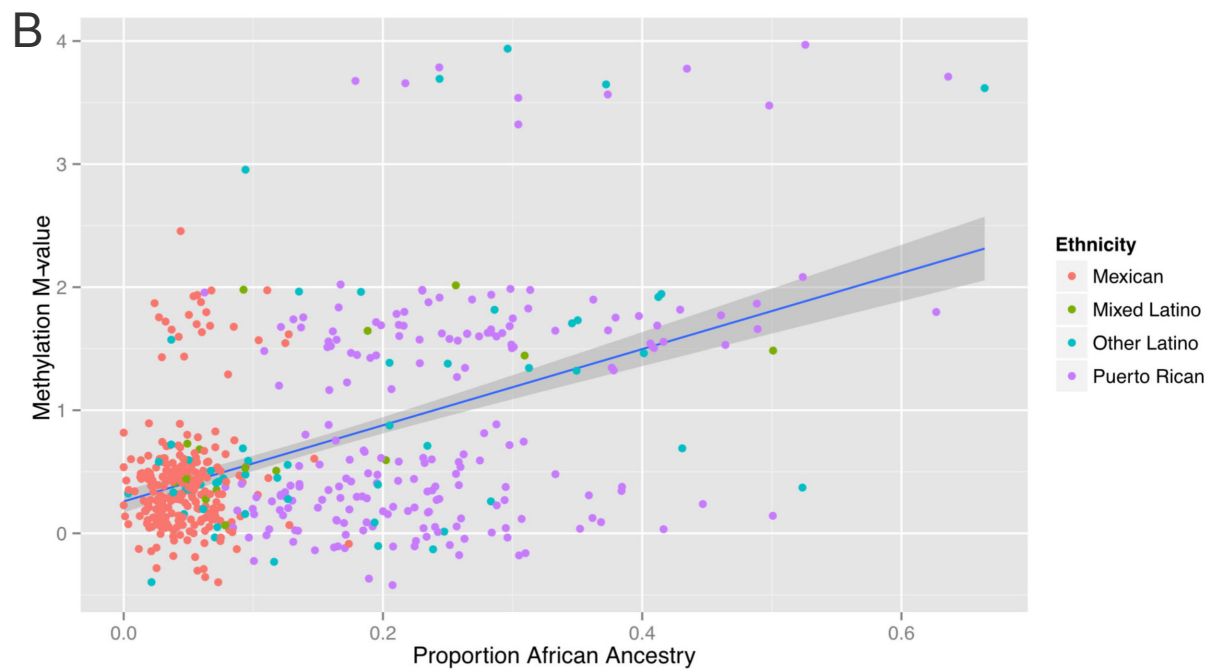

# Supplementary Figure 6

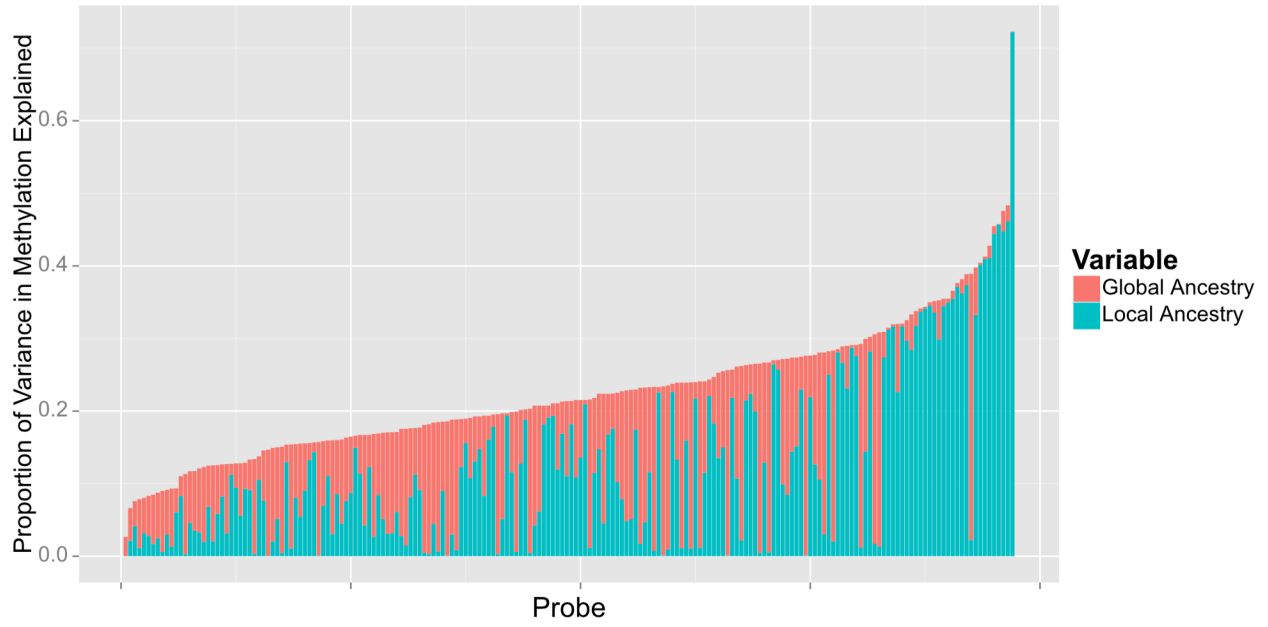

# Supplementary Figure 7

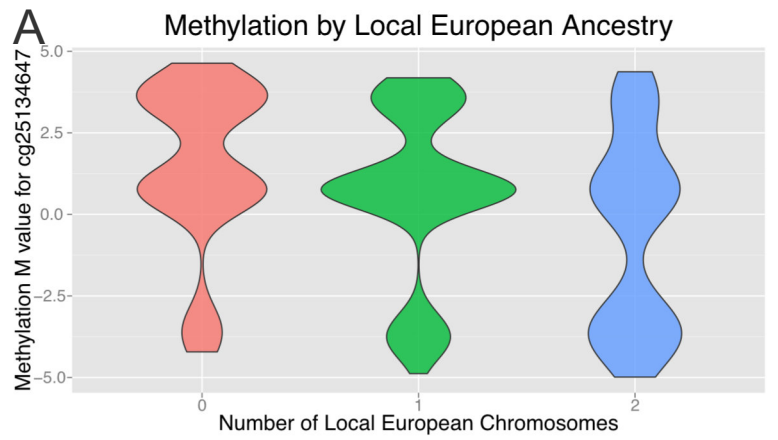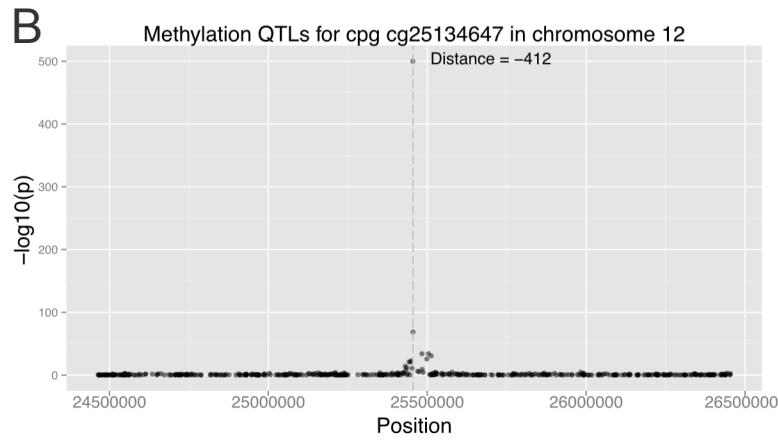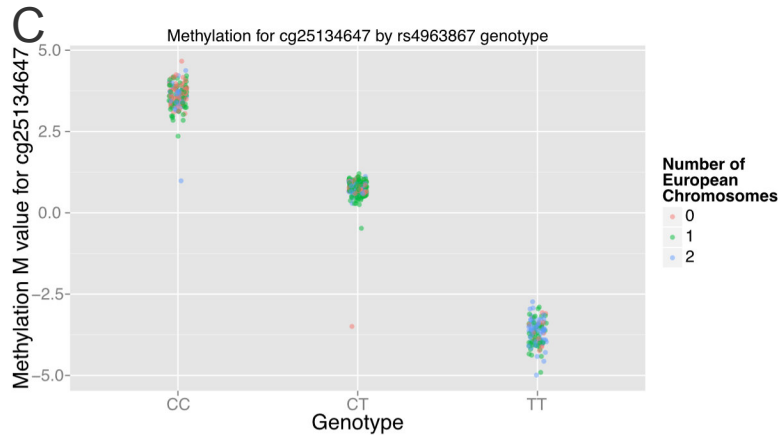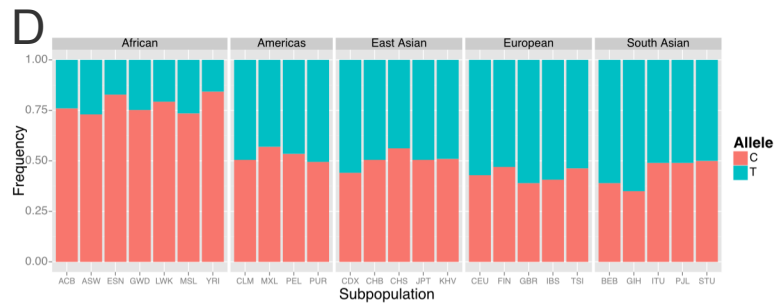

Supplement: Supplementary file [file 036822-2.pdf]
